# Supplementary material
Source: ML conference proceedings conference paper supplement (https://openaccess.thecvf.com/content/CVPR_2020/html/Liu_DIST_Rendering_Deep_CVPR_2020_paper.html)
Supplement: Supplementary file 2 [file Liu_DIST_Rendering_Deep_CVPR_2020_supplemental.zip]

Archive with 4 entries (3 files):
- 04986-supp/
- 04986-supp/04986-supp-video.mp4
- 04986-supp/04986-supp.pdf
- 04986-supp/README.txt
