# Supplementary material
Source: ML conference proceedings conference paper supplement (https://openaccess.thecvf.com/content/CVPR_2020/html/Liu_DIST_Rendering_Deep_CVPR_2020_paper.html)
Supplement: Supplementary file 2 [file Liu_DIST_Rendering_Deep_CVPR_2020_supplemental.zip › 04986-supp/README.txt]

The supplementary materials include:
(1) A PDF document including a detailed analysis of the proposed renderer, implementation details, and more qualitative results;
(2) A video showing additional rendering and comparison results (video codec: H.264).
